# Supplementary material
Source: Springer Nature journal article supplement (https://www.springermedizin.de/resource/supplementary/12885_2011_2711_MOESM4_ESM.pdf/9461760)

## Protein vs. protein

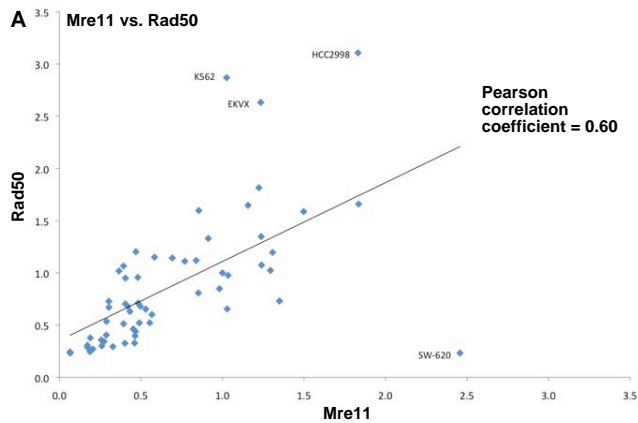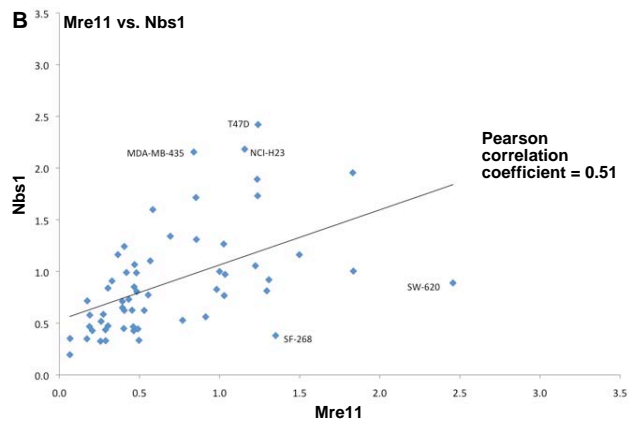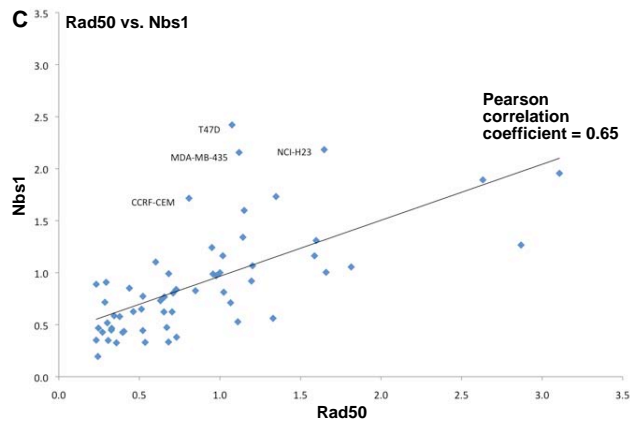

## RNA vs. protein

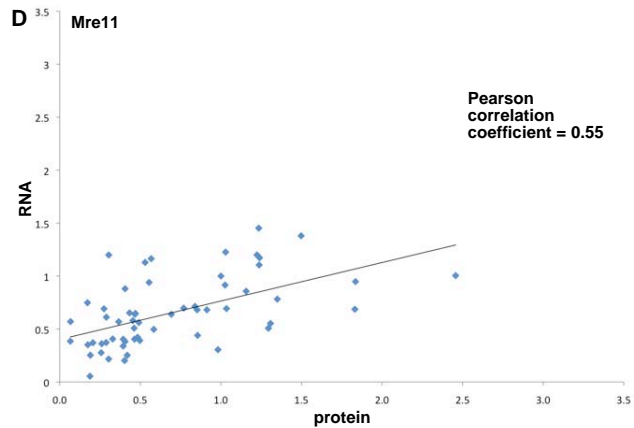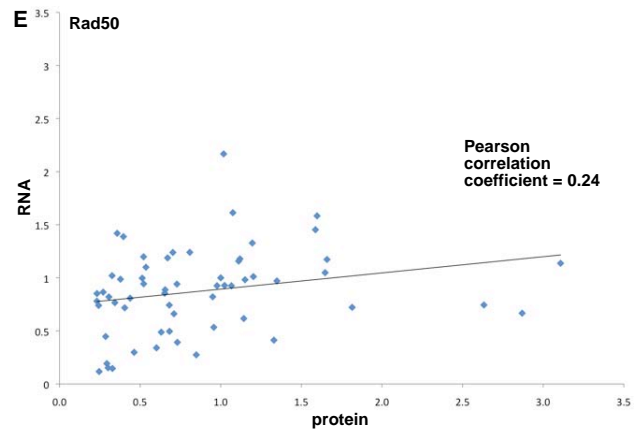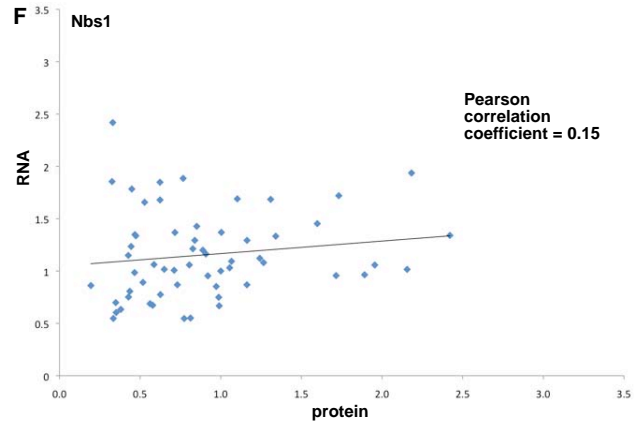

Supplement: MOESM4 [file 9461760]
